# Supplementary material for: Surface modification of graphene with functionalized carbenes and their applications in the sensing of toxic gases: a DFT study
Source: Royal Society of Chemistry journal article supplement (doi:10.1039/d3ra02557h), 2023-01-01
Supplement: d3ra02557h1.pdf [file d3ra02557h1.pdf]

## Supporting Information for

---

### Surface Modification of Graphene with Functionalized Carbenes and Their Applications in The Sensing of Toxic Gases: A DFT Study.

Sarah Aldulaijan<sup>1</sup>, Afnan Ajeebi<sup>1</sup>, Abdesslem Jedidi<sup>2</sup>, Sabri Messaoudi<sup>3,4</sup>, Nouredine Raouafi<sup>5\*</sup>, Adnene Dhouib<sup>1\*</sup>

1 Chemistry Department, College of Science, Imam Abdulrahman Bin Faisal University, P.O. Box 1982, Dammam 31441, Saudi Arabia. [saaldulaijan@iau.edu.sa](mailto:saaldulaijan@iau.edu.sa) (S.A), [afnanajeebi@hotmail.com](mailto:afnanajeebi@hotmail.com) (A.A), [amdhouib@iau.edu.sa](mailto:amdhouib@iau.edu.sa) (A.D)

2 Chemistry Department, Faculty of Science, King Abdulaziz University, Jeddah, 21589, Saudi Arabia. [ajedidi@kau.edu.sa](mailto:ajedidi@kau.edu.sa) (A.J).

3 Laboratoire des Matériaux Molécules et Applications, Université Tunis Carthage, IPEST, La Marsa 2070, Tunisia.

4 Department of Chemistry, College of Science, Qassim University, Buraidah 51452, Saudi Arabia. [S.messaoudi@qu.edu.sa](mailto:S.messaoudi@qu.edu.sa) (S.M.)

5 Sensors and Biosensors Group, Laboratory of Analytical Chemistry & Electrochemistry (LR99ES15), Faculty of Science, University of Tunis El Manar, 2092 Tunis El Manar, Tunisia. [nouredine.raouafi@fst.utm.tn](mailto:nouredine.raouafi@fst.utm.tn) (N.R).

\* Correspondence: [amdhouib@iau.edu.sa](mailto:amdhouib@iau.edu.sa) (A.D), [nouredine.raouafi@fst.utm.tn](mailto:nouredine.raouafi@fst.utm.tn) (N.R).

# Supporting Information for

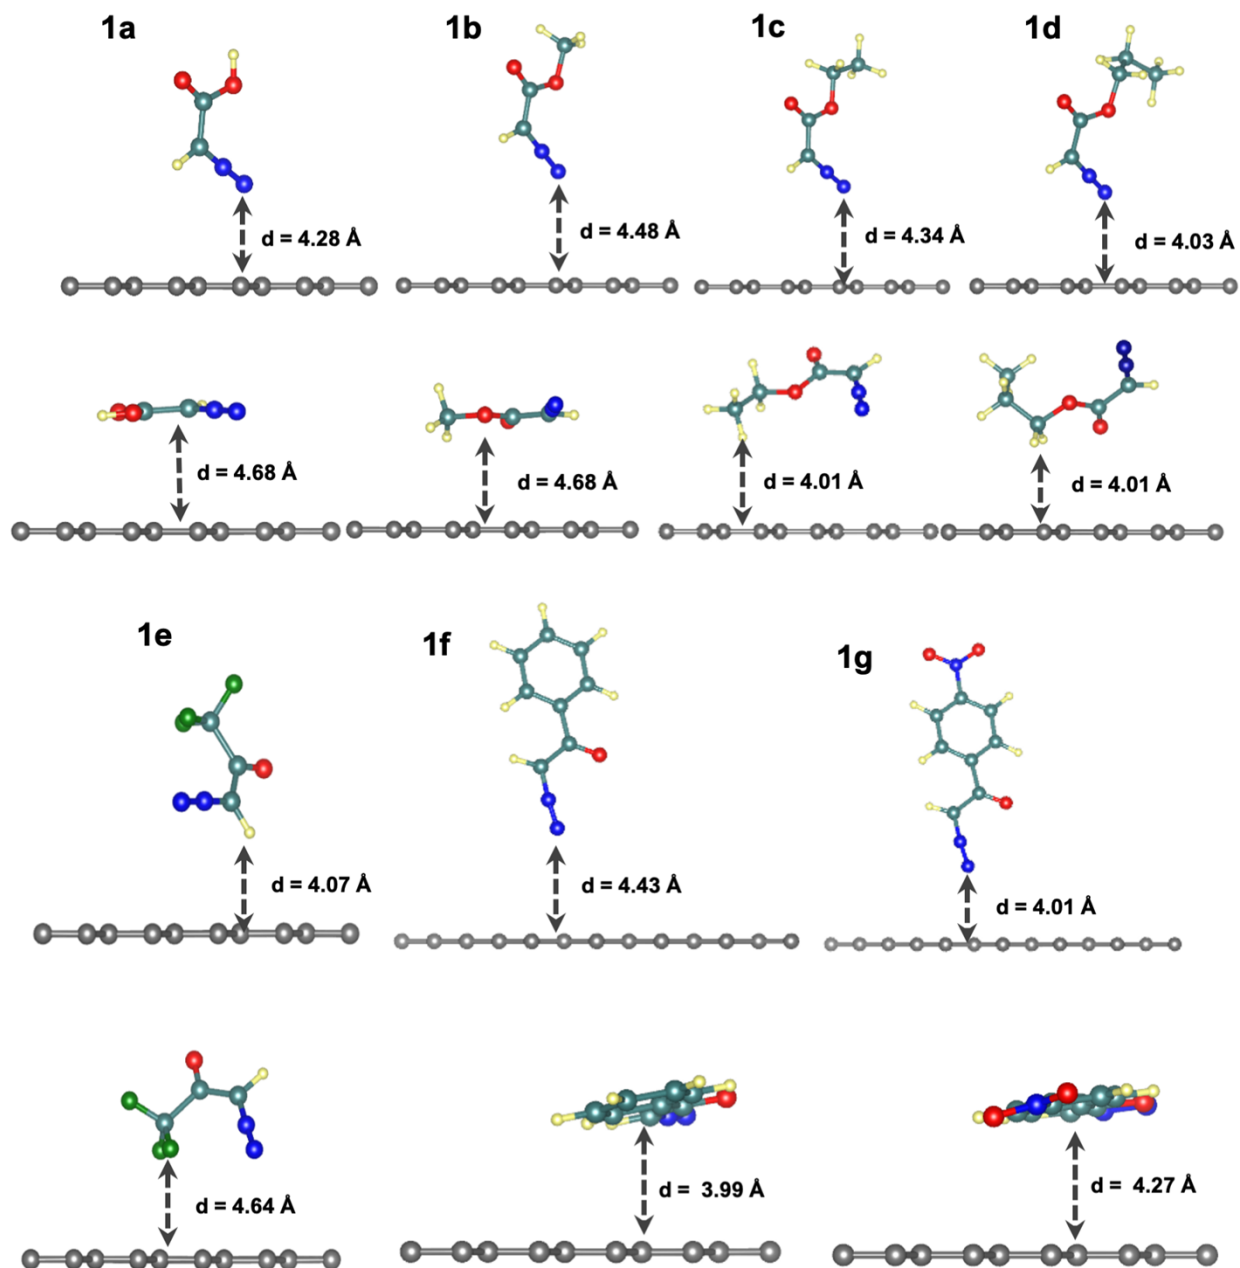

**Figure S1.** Relaxed geometries of horizontally and vertically physisorbed diazomethane **1(a-g)** on 5×5 graphene supercell. Values are for the distances between the closest atom to graphene and the graphene surface depicted from lateral and top views.

## Supporting Information for

**Table S1.** The geometrical parameters and reaction energies of cyclopropane-modified graphene derivatives on 5'5 graphene supercells

| Adsorbates | $E_{\text{ads}}(\text{eV})$ | $d^1(\text{\AA})$ | $d^2(\text{\AA})$ | $d^3(\text{\AA})$ | $d^4(\text{\AA})$ | $d^5(\text{\AA})$ | $\alpha(^{\circ})$ | $\beta(^{\circ})$ | $h(\text{\AA})$ |
|------------|-----------------------------|-------------------|-------------------|-------------------|-------------------|-------------------|--------------------|-------------------|-----------------|
| <b>3a</b>  | -1.67                       | 1.56              | 1.56              | 1.54              | 1.22              | 0.98              | 60.3°              | 117.6°            | 0.6             |
| <b>3b</b>  | -1.65                       | 1.54              | 1.55              | 1.55              | 1.22              | 1.35              | 60.3°              | 117.5°            | 0.6             |
| <b>3c</b>  | -1.60                       | 1.52              | 1.52              | 1.57              | 1.22              | 1.35              | 62.3°              | 117.3°            | 0.7             |
| <b>3d</b>  | -1.64                       | 1.54              | 1.52              | 1.56              | 1.22              | 1.36              | 61.1°              | 117.2°            | 0.7             |
| <b>3e</b>  | -1.71                       | 1.59              | 1.57              | 1.52              | 1.22              | 1.56              | 57.7               | 117.9°            | 0.6             |
| <b>3f</b>  | -1.33                       | 1.57              | 1.56              | 1.54              | 1.21              | 1.50              | 58.8°              | 117.9°            | 0.6             |
| <b>3g</b>  | -1.39                       | 1.58              | 1.56              | 1.53              | 1.24              | 1.51              | 58.1°              | 118.0°            | 0.6             |
